# Supplementary material
Source: HighWire-hosted journal article supplement (https://cmaj.ca/highwire/filestream/58704/field_highwire_adjunct_files/0/five-yen-app_1.pdf)
Supplement: five-yen-app_1.pdf [file five-yen-app_1.pdf]

**Appendix 1:** Effectiveness of modalities used to identify kidney stones and the resultant radiation exposure<sup>1-6</sup>

| Modality                                  |             |             |                                                                               | Radiation exposure                      |                                         |
|-------------------------------------------|-------------|-------------|-------------------------------------------------------------------------------|-----------------------------------------|-----------------------------------------|
|                                           | Adult       |             | Pediatric                                                                     | Effective dose in an adult, 95% CI, mSv | Absorbed dose in a fetus, min-max, mGy* |
|                                           | Sensitivity | Specificity | Accuracy, %                                                                   |                                         |                                         |
| Ultrasonography                           | 13-100†     | 97-100      | Stone location<br>• 90 in kidney<br>• 75 in kidney + ureter<br>• 38 in ureter | -                                       | -                                       |
| Plain radiography                         | 45-59       | 71-77       | Sensitivity 30-60                                                             | 0.5-0.9                                 | 1.4-4.2                                 |
| Ultrasonography and plain radiography     | 94-97       | 90          | NA                                                                            | 0.5-0.9                                 | 1.4-4.2                                 |
| Intravenous urography                     | 64-97       | 92-94       | NA                                                                            | 1.3-3.5                                 | 1.7-10                                  |
| Non-contrast-enhanced computed tomography |             |             |                                                                               |                                         |                                         |
| Standard dose                             | 95-100      | 94-100      | 89-100                                                                        | 8-16                                    | 8.0-49                                  |
| Reduced dose                              | 98          | 95          | 89-100‡                                                                       | 0.5-2.0                                 | 4                                       |

Note: NA = not available.  
\*Exposure < 50 mGy in a fetus has not been shown to be associated with an increased risk of fetal anomalies or loss of pregnancy.<sup>3</sup>  
†Sensitivity 13% with kidney stones < 3 mm, 96%-100% with stones > 5mm.  
‡Computed tomography performed with a reduced tube current resulted in a dose reduction of 25%-90% without a significant change in accuracy. The amount of reduction depends on patient size and habitus.

**References**

1. Jindal G, Ramchandani P. Acute flank pain secondary to urolithiasis: radiologic evaluation and alternate diagnoses. *Radiol Clin North Am* 2007;45:395-410.
2. Dhar M, Denstedt JD. Imaging in diagnosis, treatment, and follow-up of stone patients. *Adv Chronic Kidney Dis* 2009;16:39-47.
3. Srirangam SJ, Hickerton B, Cleynenbreugel BV. Management of urinary calculi in pregnancy: a review. *J Endourol* 2008;22:867-75.
4. Hiorns MP. Imaging of urinary tract lithiasis: Who, when and how? *Pediatr Radiol* 2008;38(Suppl 3):S497-500.
5. Heneghan JP, McGuire KA, Leder RA, et al. Helical CT for nephrolithiasis and ureterolithiasis: comparison of conventional and reduced radiation-dose techniques. *Radiology* 2003;229:575-80.
6. Cody DD, Moxley DM, Krugh KT, et al. Strategies for formulating appropriate MDCT techniques when imaging the chest, abdomen, and pelvis in pediatric patients. *AJR Am J Roentgenol* 2004;182:849-59.
